# Supplementary material
Source: PubMed Central journal article supplement (PMC7550267)
Supplement: deaa157_supplementary_figure_i.pdf [file deaa157_supplementary_figure_i.pdf]

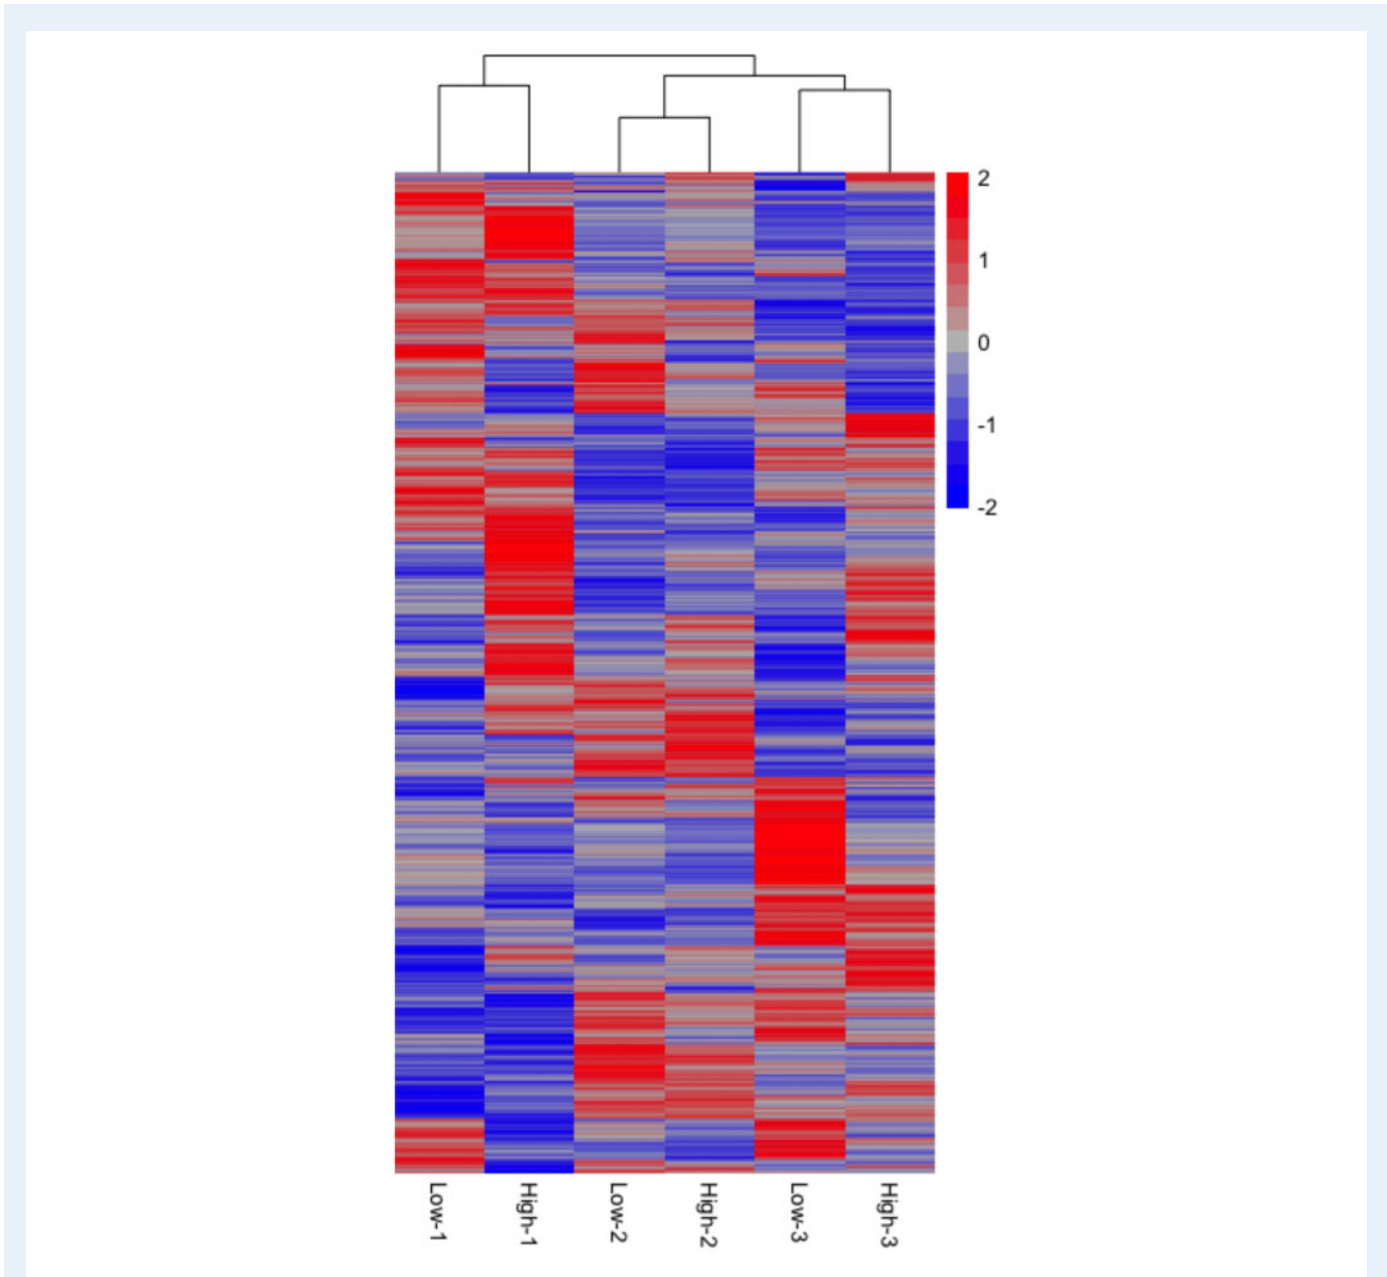

**Supplementary Figure S1. Heat map comparing gene expression in human polycystic ovarian syndrome (PCOS) like (High) and control (Low).** Unbiased two-way hierarchical clustering analysis as performed by R Package heatmap (Kolde Raivo version 1.0.12, <http://CRAN.R-project.org/package=heatmap>) on 16 467 genes that were detected using RNAseq.
