# Supplementary material
Source: PubMed Central journal article supplement (PMC7550267)
Supplement: deaa157_supplementary_figure_ii.pdf [file deaa157_supplementary_figure_ii.pdf]

**A**

## GSEA post-hoc pathway analysis: pathways with FWER p-value &lt;0.05

| Gene Set                           | Size | ES     | NES    | NOM p-val | FDR 1-val | FWER p-val |
|------------------------------------|------|--------|--------|-----------|-----------|------------|
| INTRACILIARY TRANSPORT PARTICLE    | 27   | -0.775 | -2.168 | 0         | 0         | 0          |
| MHC PROTEIN COMPLEX                | 21   | -0.846 | -2.193 | 0         | 0         | 0          |
| STRUCTURAL CONSTITUENT OF RIBOSOME | 157  | -0.601 | -2.218 | 0         | 0         | 0          |
| CILIUM MOVEMENT                    | 70   | -0.678 | -2.235 | 0         | 0         | 0          |
| MOTILE CILIUM                      | 166  | -0.602 | -2.241 | 0         | 0         | 0          |
| CILIARY PLASM                      | 115  | -0.642 | -2.299 | 0         | 0         | 0          |
| MHC CLASS II PROTEIN COMPLEX       | 16   | -0.985 | -2.385 | 0         | 0         | 0          |
| AXONEME ASSEMBLY                   | 58   | -0.765 | -2.464 | 0         | 0         | 0          |
| AXONEMAL DYNEIN COMPLEX ASSEMBLY   | 29   | -0.772 | -2.12  | 0         | 0         | 0.003      |
| RIBOSOMAL SUBUNIT                  | 181  | -0.568 | -2.123 | 0         | 0         | 0.003      |
| CYTOSOLIC RIBOSOME                 | 100  | -0.604 | -2.097 | 0         | 0         | 0.007      |
| CILIUM ORGANIZATION                | 364  | -0.528 | -2.098 | 0         | 0         | 0.007      |
| MICROTUBULE BUNDLE FORMATION       | 90   | -0.614 | -2.088 | 0         | 0.001     | 0.009      |
| CYTOSOLIC SMALL RIBOSOMAL SUBUNIT  | 42   | -0.695 | -2.075 | 0         | 0.001     | 0.012      |
| MOTILE CILIUM ASSEMBLY             | 22   | -0.763 | -2.025 | 0         | 0.002     | 0.038      |
| INTRACILIARY TRANSPORT             | 53   | -0.638 | -2.01  | 0         | 0.002     | 0.045      |

**B**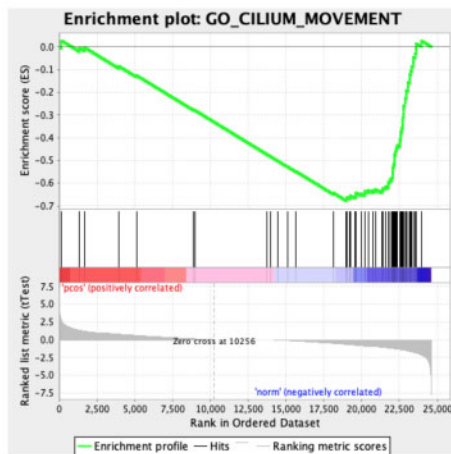**C**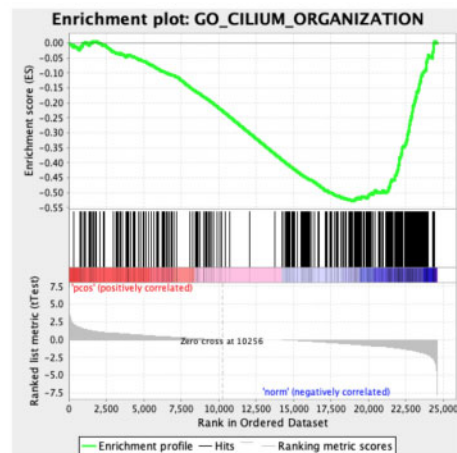

**Supplementary Figure S2.** (A) Pathways identified by gene set enrichment analysis (GSEA) as being significantly dysregulated by PCOS-like conditions with a family-wise-error rate (FWER) *P*-value of less than 0.05. (B and C) Representative GSEA plots of two chosen pathways impacting cilia function and assembly.
