# Supplementary material
Source: PubMed Central journal article supplement (PMC7550267)
Supplement: deaa157_supplementary_figure_iii.pdf [file deaa157_supplementary_figure_iii.pdf]

human reproduction SUPPLEMENTARY DATA

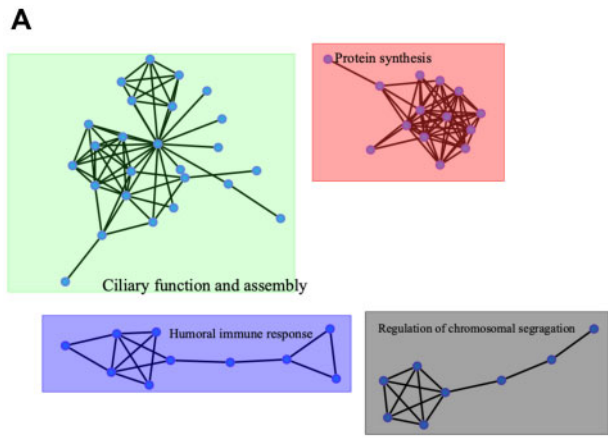

**B** GSEA leading edge analysis

| Gene     | Pathway Count | Log2 Fold Change | FDR Adj. p Value |
|----------|---------------|------------------|------------------|
| DNAH5    | 7             | -0.7948286       | 0.0435408        |
| LRRC6    | 6             | -0.8887169       | 0.02652041       |
| HYDIN    | 5             | -0.8073503       | 0.01389937       |
| RPL22    | 3             | -0.4615764       | 0.0191597        |
| RPL29    | 3             | -0.3939145       | 0.0050124        |
| ARMC2    | 3             | -0.7467087       | 0.04711549       |
| LRGUK    | 3             | -0.9003781       | 0.03034573       |
| WDR34    | 3             | -0.6553714       | 0.00775826       |
| HLA-DRB5 | 2             | -0.8312272       | 0.00744005       |
| MRPS2    | 2             | -0.423432        | 0.04146957       |
| SPEF1    | 2             | -0.9388008       | 0.02666659       |
| TCTEX1D4 | 2             | -0.9656942       | 0.02029424       |
| FOXJ1    | 2             | -0.8627706       | 0.04388163       |
| NDUFAB1  | 1             | -0.2715718       | 0.01851209       |
| CCNO     | 1             | -0.9100443       | 0.02187927       |
| NEK2     | 1             | -0.7824038       | 0.0424908        |

**Supplementary Figure S3. (A)** Cytoscape pathway clustering analysis of pathways identified by GSEA with  $P$ -value  $<0.005$  and false discovery rate (FDR)  $q$ -value  $<0.1$ . **(B)** GSEA leading edge analysis of enrichment score driving genes over-represented in pathways with FWER  $P$ -value  $<0.05$ .
