# Supplementary material
Source: PubMed Central journal article supplement (PMC7550267)
Supplement: deaa157_supplementary_table_i.pdf [file deaa157_supplementary_table_i.pdf]

**Supplementary Table S1 Antibodies used and conditions.**

| <b>Antibody</b>    | <b>Company</b> | <b>Catalog#</b> | <b>Dilution</b> |
|--------------------|----------------|-----------------|-----------------|
| Acetylated tubulin | Sigma          | T7451           | 1:50            |
| Androgen receptor  | Protein Tech   | 22089-1-AP      | 1:250           |
| Estrogen receptor  | Santacruz      | SC-8002         | 1:100           |
| FOXJ1              | Invitrogen     | 14-9965-82      | 1:25            |
| OVGP1*             | Abcam          | ab74544         | 1:50            |

\*Oviduct-specific glycoprotein I.
