# Supplementary material
Source: PubMed Central journal article supplement (PMC7550267)
Supplement: deaa157_supplementary_table_ii.pdf [file deaa157_supplementary_table_ii.pdf]

**Supplementary Table SII Primers used and sequences.**

| <b>Primer</b>    | <b>Sequence</b>        |
|------------------|------------------------|
| <i>OVGP1-F</i>   | GCTAAGGATCTCCAGGATGAG  |
| <i>OVGP1-R</i>   | CGGTTGGCAAATGTGGAC     |
| <i>ERalpha-F</i> | TCCTACCAGACCCTTCAGTG   |
| <i>ERalpha-R</i> | GGTCAAATCCACAAAGCCTG   |
| <i>AR-F</i>      | GCACCTCTCTCAAGAGTTTG   |
| <i>AR-R</i>      | GCCCATCCACTGGAATAATG   |
| <i>FOXJ1-F</i>   | CCACCTGGCAGAATTCAATC   |
| <i>FOXJ1-R</i>   | TTGCCTGGTTCGTCCTT      |
| <i>KIF5C-F</i>   | TGATCGGGCAAGGGAAG      |
| <i>KIF5C-R</i>   | CGCACATGCATTGTAAAC     |
| <i>LRRC6-F</i>   | AACTTGAAGGATGTGAAGAG   |
| <i>LRRC-R</i>    | GAGCTCCTTCAGATGGATATTG |
| <i>18S F</i>     | GCTTGCCTTGATTAAGTCCC   |
| <i>18S R</i>     | GCCTCACTAAACCATCCAATC  |
